# Supplementary material for: CXCR4 mediates matrix stiffness-induced downregulation of UBTD1 driving hepatocellular carcinoma progression via YAP signaling pathway
Source: PubMed Central journal article supplement (PMC7255012; doi:10.7150/thno.44789), 2020-04-27
Supplement: thnov10p5790s1.pdf [file thnov10p5790s1.pdf]

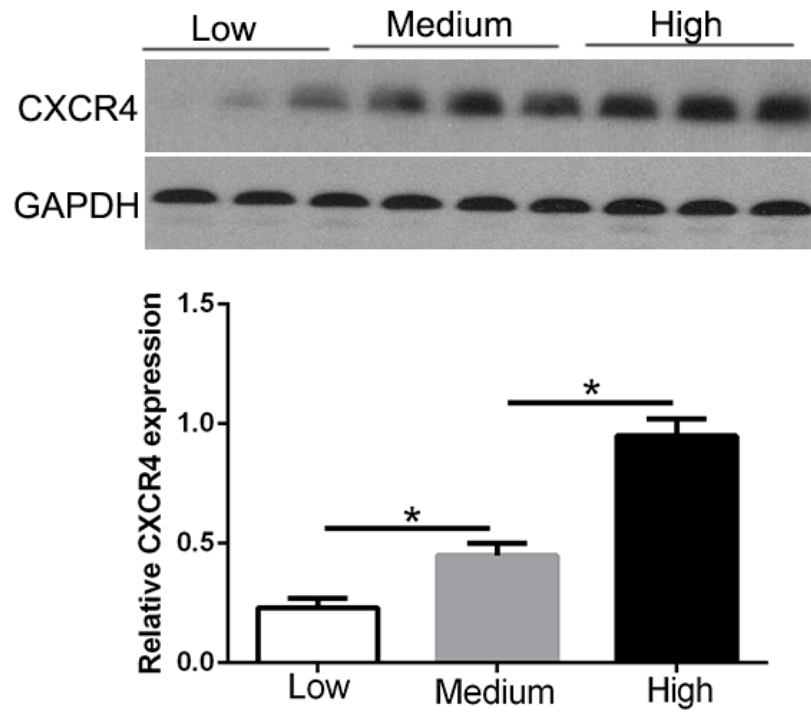

**Figure S1.** Western blotting showing high expression of CXCR4 in HCC tissues with high and medium stiffness background as compared with that of normal stiffness background. \* $P < 0.05$ .

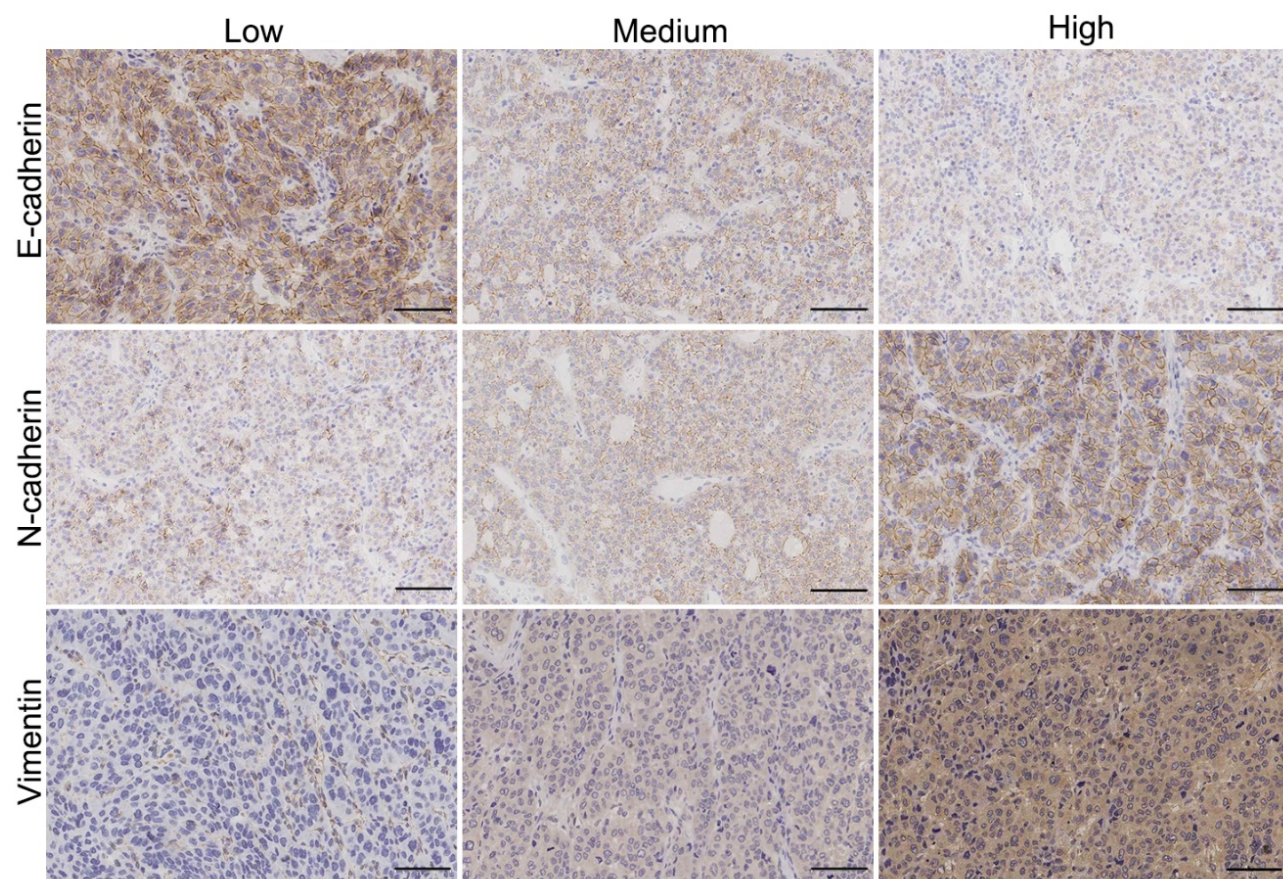

**Figure S2.** Expression levels of EMT-related proteins in HCC tissues with normal, medium, and high liver stiffness backgrounds.

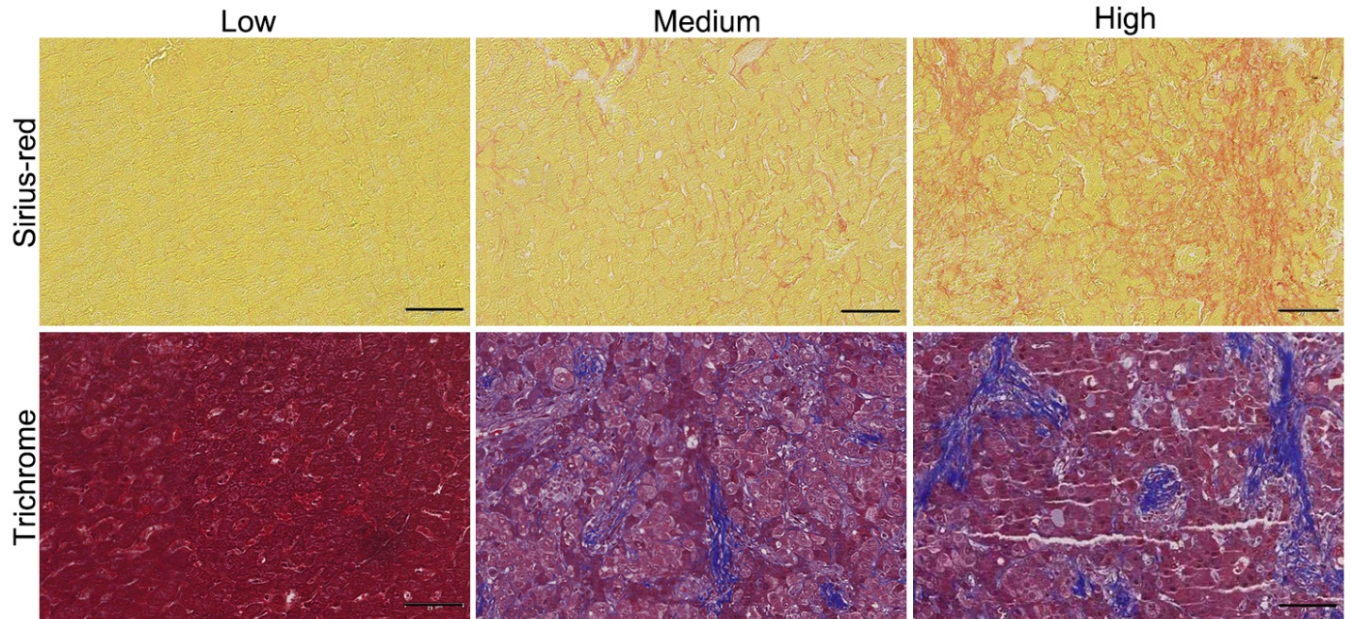

**Figure S3.** Sirius red and trichrome staining to show the extracellular matrix in normal, medium, and high liver stiffness backgrounds.

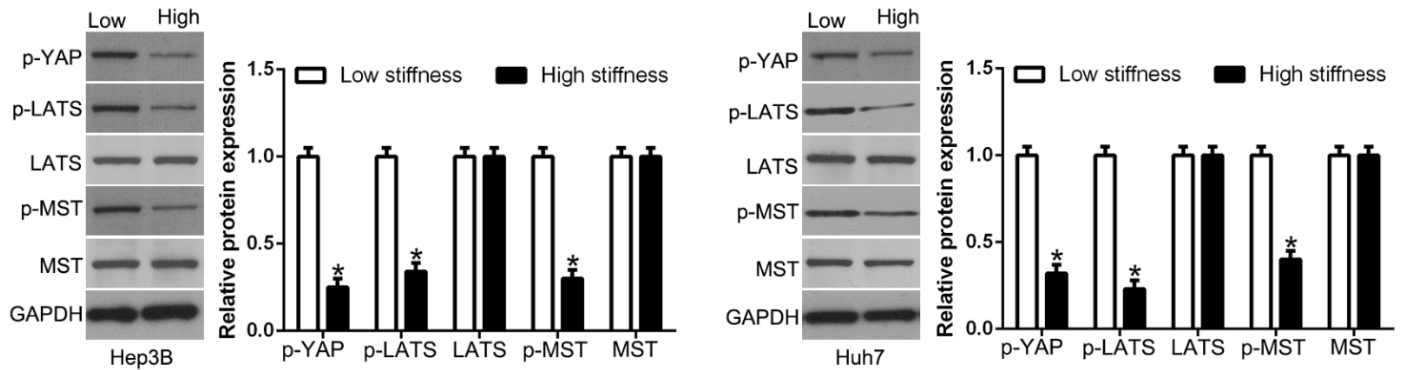

**Figure S4.** Western blotting showing that matrix stiffness regulated the phospho-YAP, MST, phospho-MST, LATS1, and phospho-LATS1 status in HCC cells. \*P < 0.05.

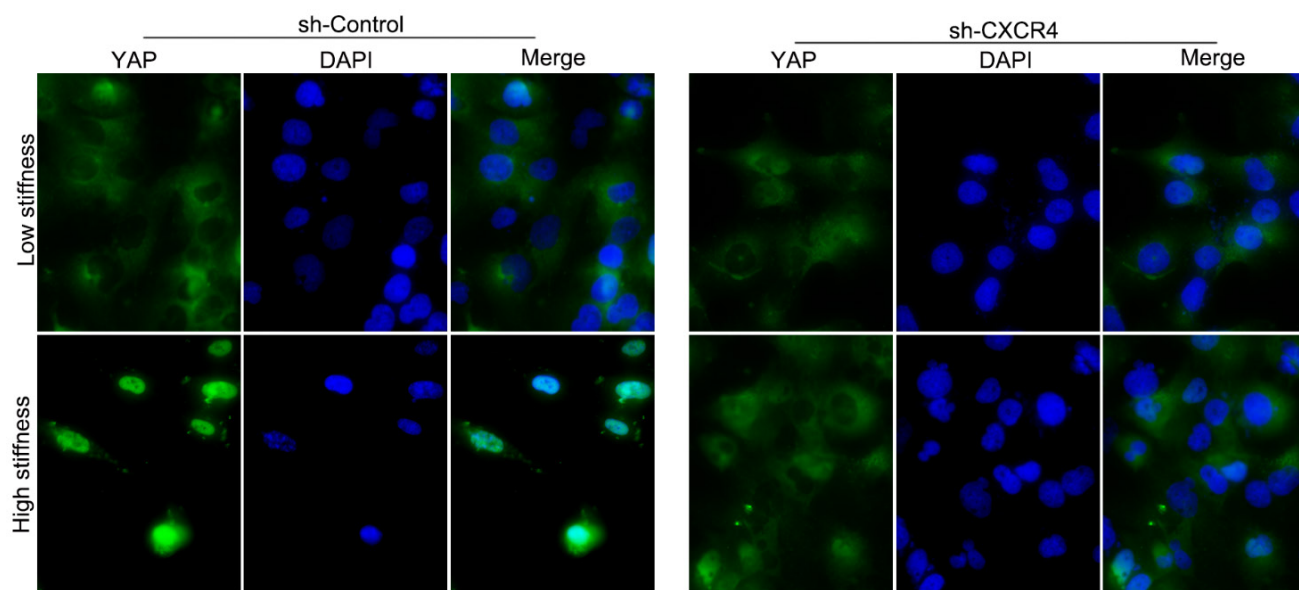

**Figure S5.** Stiffness-mediated YAP upregulation and nuclear accumulation were abrogated by CXCR4 shRNA in Huh7 cells.

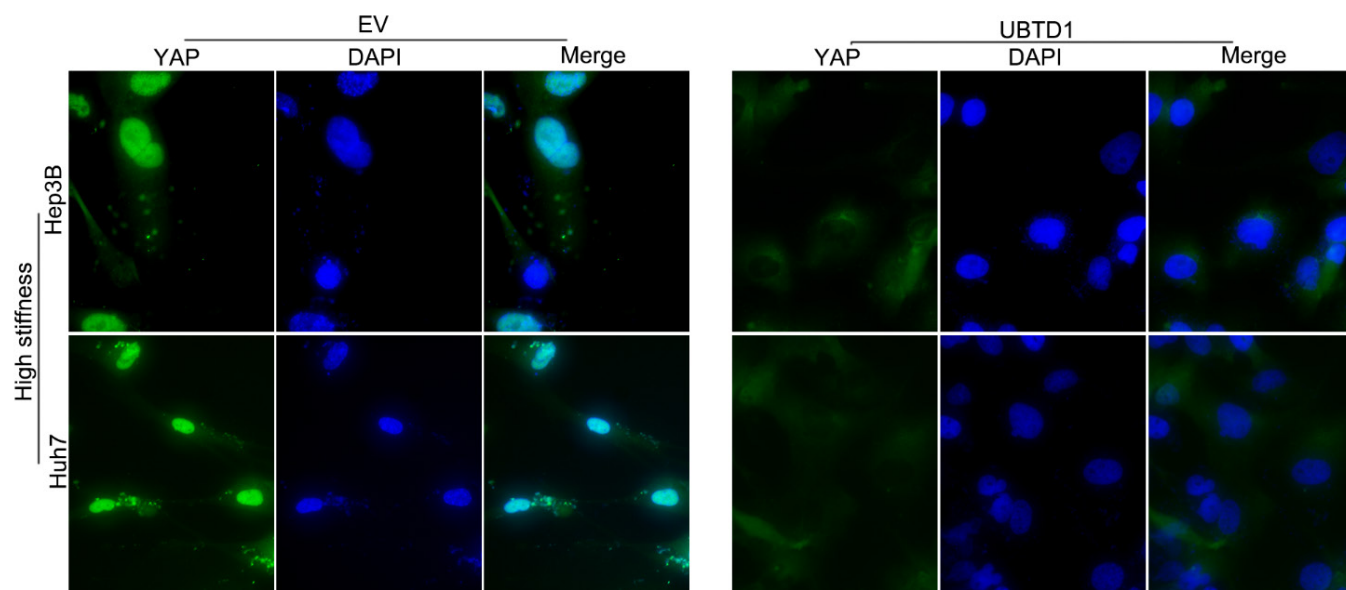

**Figure S6.** UBTD1 overexpression changed the localization of YAP in high stiffness.

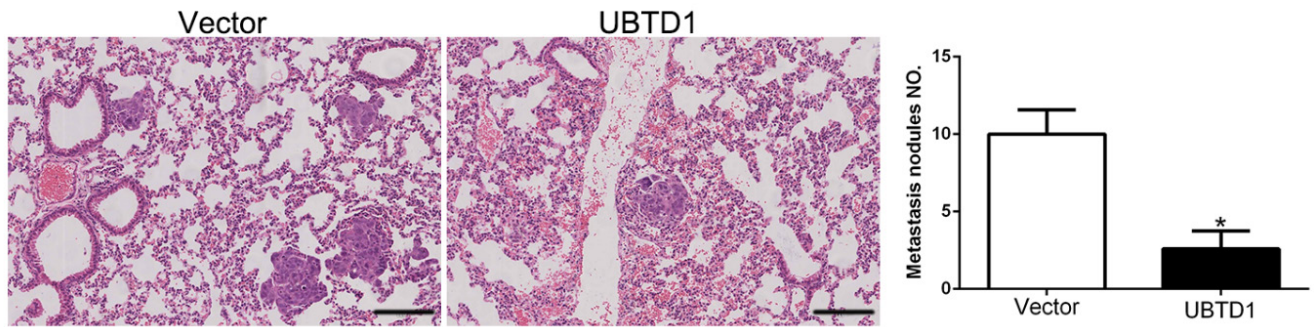

**Figure S7.** UBTD1 overexpression markedly decreased lung metastasis in vivo. \*P < 0.05.

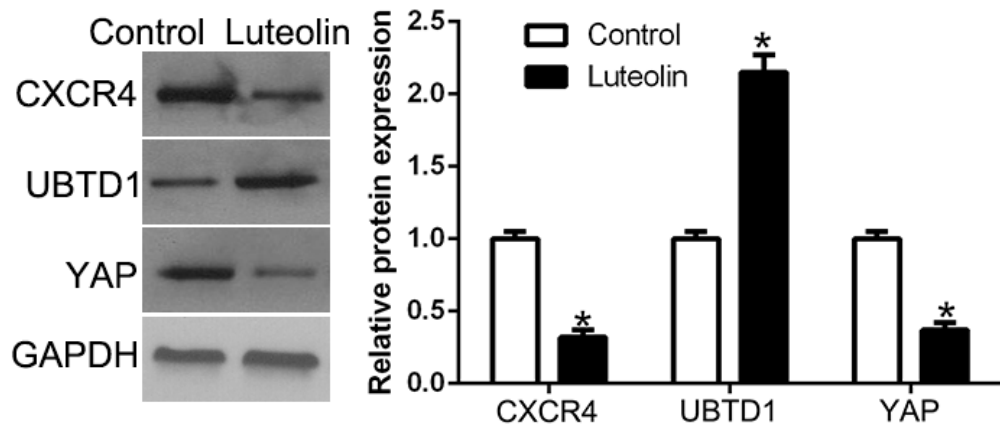

**Figure S8.** Luteolin regulated CXCR4/UBTD1/YAP expression in the subcutaneous tissues. \*P < 0.05.

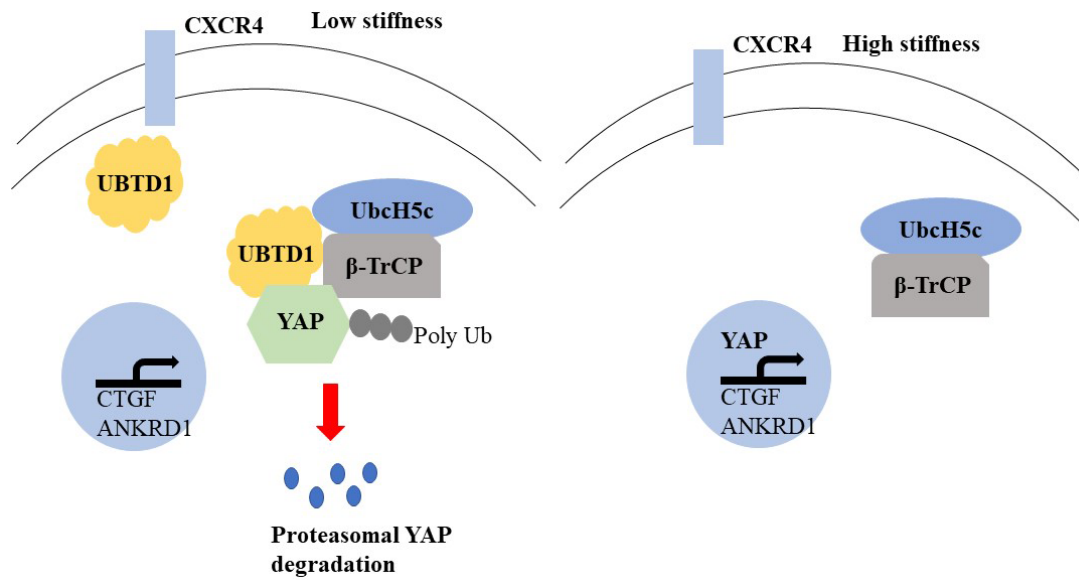

**Figure S9.** Schematic showing that CXCR4 is a mechano-transducer that relays extracellular mechanical signals to induce UBTD1 down-regulation, which decreases YAP ubiquitylation degradation, resulting in activation of YAP targeting genes. UBTD1 promotes the interaction of YAP with its E3 ubiquitin ligase  $\beta$ -TrCP, and decreases YAP ubiquitylation to trigger YAP activation and its downstream signaling. Matrix stiffness acts through CXCR4 and its downstream UBTD1 to modulate a YAP/TAZ-mediated mechano-responsive signaling pathway.
